# Supplementary material for: Apparent Polyploidization after Gamma Irradiation: Pitfalls in the Use of Quantitative Polymerase Chain Reaction (qPCR) for the Estimation of Mitochondrial and Nuclear DNA Gene Copy Numbers
Source: Int J Mol Sci. 2013 May 30;14(6):11544–59. doi: 10.3390/ijms140611544 (PMC3709747; doi:10.3390/ijms140611544)

# Supplementary Information

**Figure S1.** The PCR efficiency was determined by serial dilution of cDNA template of known concentration. The efficiency (E) of each primer set to amplify the target gene is shown in each graph.

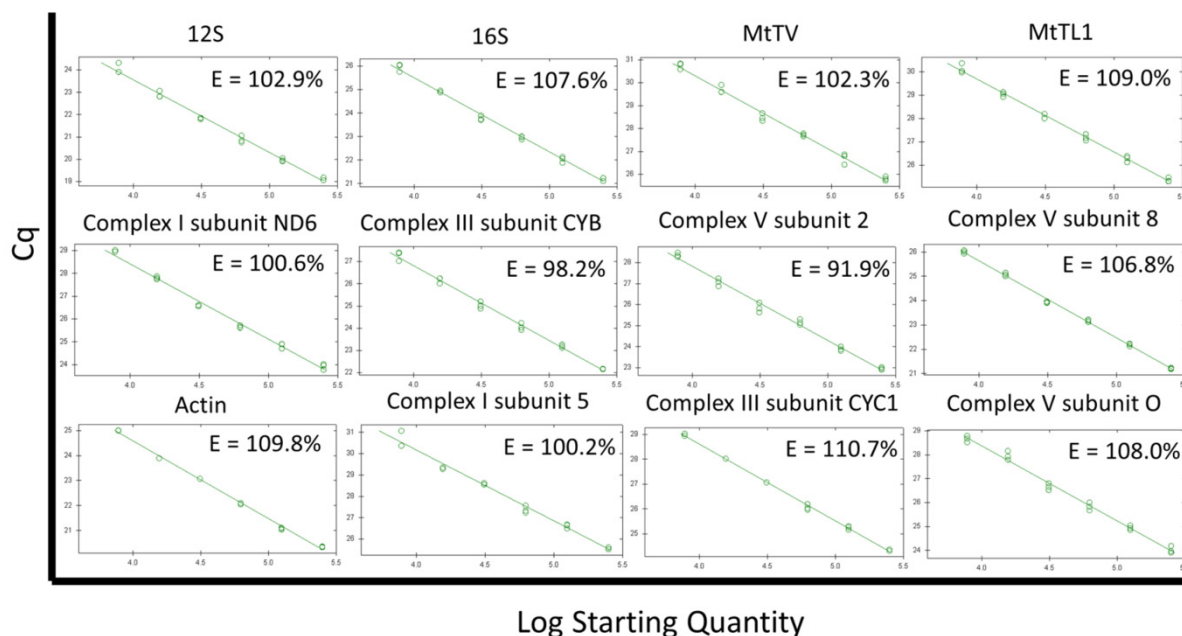

Supplement: Supplementary file 1 [file ijms-14-11544-s001.pdf]
